# Supplementary material
Source: PubMed Central journal article supplement (PMC5791085)
Supplement: ASN.2017030290SupplementaryData2.pdf [file ASN.2017030290SupplementaryData2.pdf]

## **SIGNIFICANCE STATEMENT**

Neointima formation is the leading cause of arteriovenous fistula (AVF) failure. This article reports evidence that loss of glutathione S-transferase  $\alpha 4$  in CKD causes the accumulation of 4-hydroxy-nonenal, which in turn, stimulates proliferation of vascular smooth muscle cells. These responses result in neointima formation and accelerate AVF failure. Increasing glutathione S-transferase  $\alpha 4$  expression may provide a protective strategy to improve AVF maturation.
